# Supplementary material
Source: publisher figshare collection journal article supplement (https://tandf.figshare.com/ndownloader/files/13646468)
Supplement: Supplementary file 1 [file 13646468]

## SUPPLEMENTARY MATERIAL

# The age of ambergris

S. J. Rowland<sup>\*1</sup>, P. A. Sutton<sup>1</sup> & T. D. J. Knowles<sup>2</sup>

<sup>1</sup>*Petroleum and Environmental Geochemistry Group, Biogeochemistry Research Centre, University of Plymouth, Drake Circus, Plymouth, PL4 8AA, UK.*

<sup>2</sup>*Bristol Radiocarbon Accelerator Mass Spectrometry Facility (BRAMS), Schools of Chemistry and Arts, University of Bristol, 43 Woodland Road, Bristol, BS8 1TS, UK.*

\*Corresponding Author:

Phone: +44 (0)1752 584557

Fax: +44 (0)1752 584710

E-mail: [srowland@plym.ac.uk](mailto:srowland@plym.ac.uk)

## Abstract

Ambergris, which is a coprolith originating from the sperm whale, has been found only rarely, but for centuries, as jetsam on beaches all over the world. There are no reliable data indicating how long such samples may have remained at sea, with unsubstantiated accounts suggesting maybe decades. Here, we obtained over forty jetsam samples collected on known dates, from mostly known beach locations across the globe. Such an inventory of verified jetsam ambergris is unprecedented. Each sample was characterised by analytical methods such as gas chromatography-mass spectrometry (GC-MS). We then determined the radiocarbon ages of some of the samples by well-described accelerator-MS techniques. Surprisingly, some samples of jetsam have remained in the environment for about a thousand years.

## Experimental

### ***Materials***

Jetsam ambergris samples were collected from beaches worldwide, including by ourselves, and on receipt were stored in a dry dark cabinet prior to analysis (Rowland and Sutton 2017).

### ***Methods***

The methods for GC-MS analysis have been published (Rowland and Sutton 2017). Methods for AMS are well described (Bronk Ramsey 2017). Due to their chemical purity (mean 81% ambrein; Table 1), samples were graphitised (Wacker et al. 2010) without pretreatment and analysed using a MICADAS AMS (Synal et al. 2007).

**Figure S1.** Example calibration curves for samples from Chile (samples 6-9) and Somalia (sample 10).

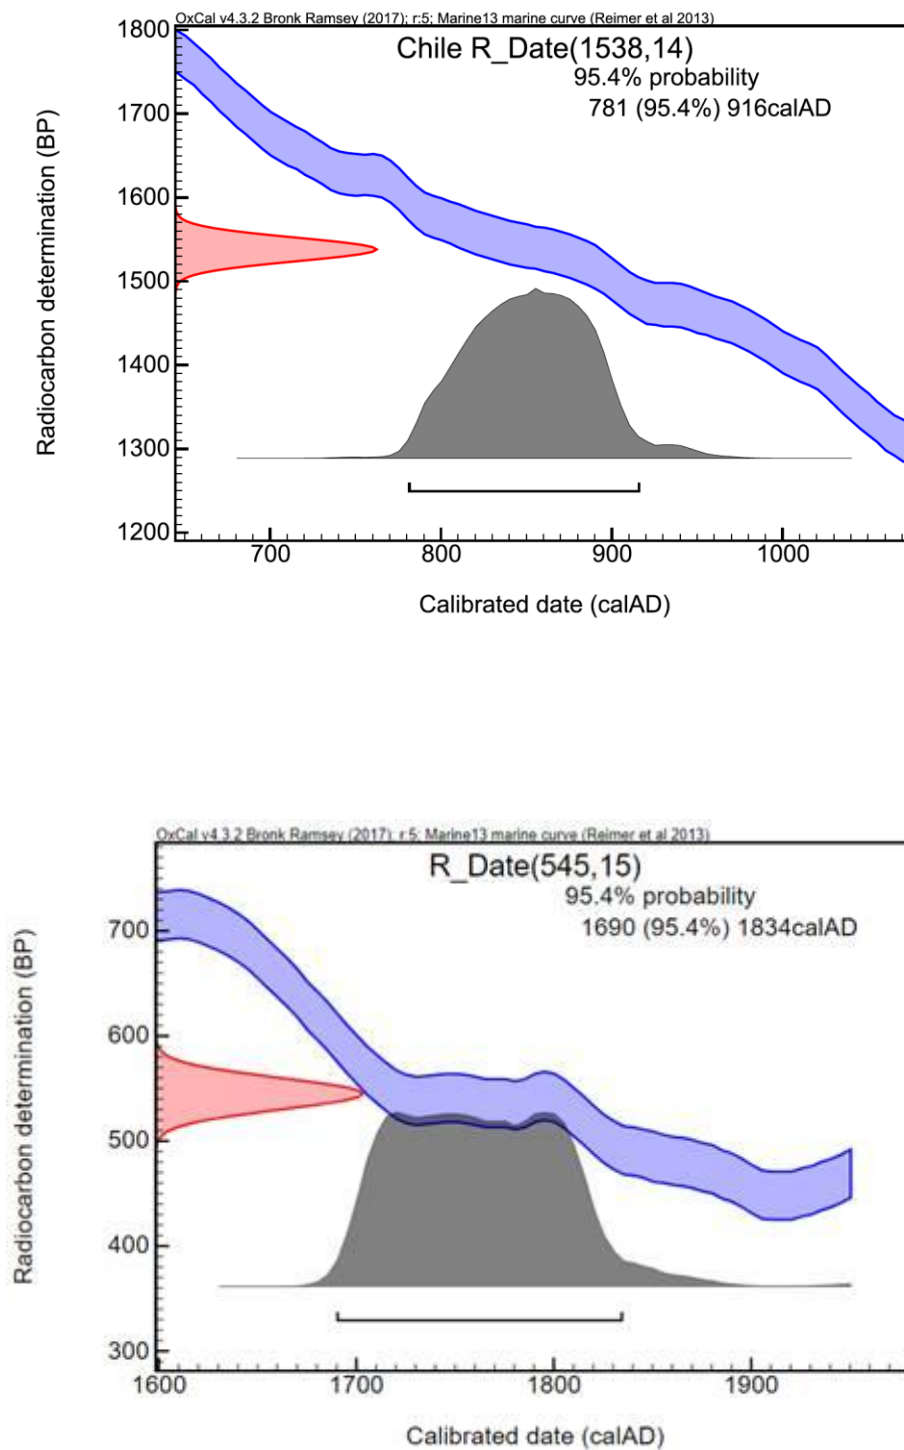

**Figure S2.** Calibration curve for an additional sample from Mar Brava, Chiloé, Chile

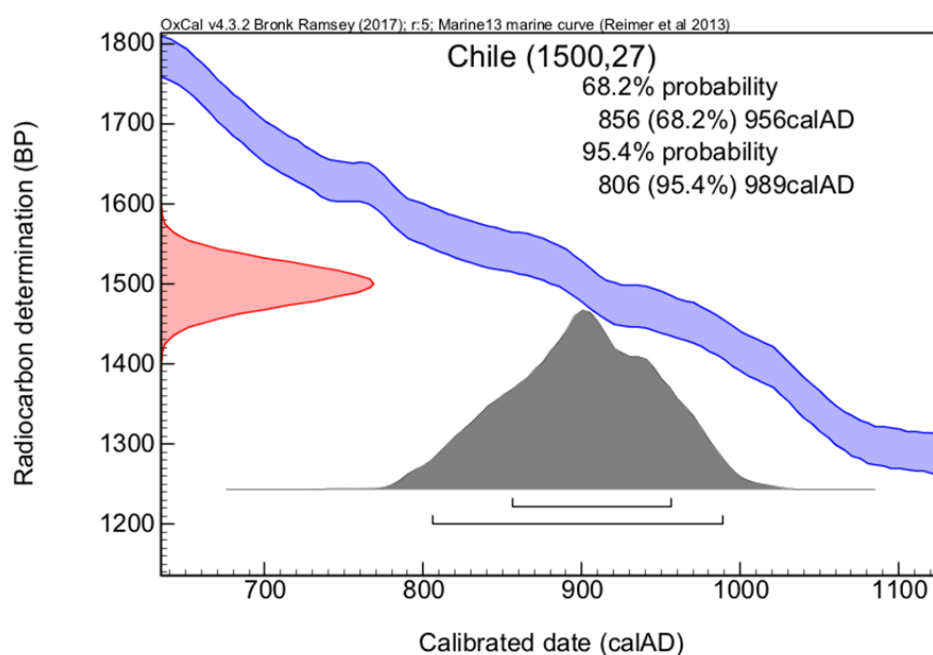

**Table S1.** Radiocarbon and  $^{13}\text{C}$  data for ambergris collected from a dead sperm whale beached on 15 December 2012 at Razende Bol near Texel, Netherlands and archived by the Ecomare Museum, Texel and an additional sample from Chile (calibration for the latter is shown in Figure S2).

| Sample Name            | $\delta^{13}\text{C}$ (‰) | $^{14}\text{C}$ Age (BP) | $F^{14}\text{C}$ |
|------------------------|---------------------------|--------------------------|------------------|
| Texel 15.12.12         | -21.1                     | -486                     | 1.062±0.003      |
| Mar Brava Chiloé Chile | -21.1                     | 1500                     | 0.829±0.003      |

### References for Supplementary Information

Bronk Ramsey C. 2017. Methods for Summarizing Radiocarbon Datasets. Radiocarbon, 59: 1809-1833.

Reimer P.J. et al. 2013. Intcal13 and marine13 radiocarbon age calibration curves 0–50,000 years cal bp. Radiocarbon, 55: 1869-1887.

Rowland SJ. Sutton PA. 2017. Chromatographic and spectral studies of jetsam and archived ambergris. Natural Product Research 31: 1752-1757.

Wacker L. Nemec M. Bourquin J. 2010. A revolutionary graphitisation system: Fully automated, compact and simple. Nuclear Instruments and Methods in Physics Research B, 268: 931-934.
